# Supplementary material for: Promising prospects of nanopore sequencing for algal hologenomics and structural variation discovery
Source: PubMed Central journal article supplement (PMC6854639; doi:10.1186/s12864-019-6248-2), 2019-11-13
Supplement: 12864_2019_6248_MOESM5_ESM.pdf [file 12864_2019_6248_MOESM5_ESM.pdf]

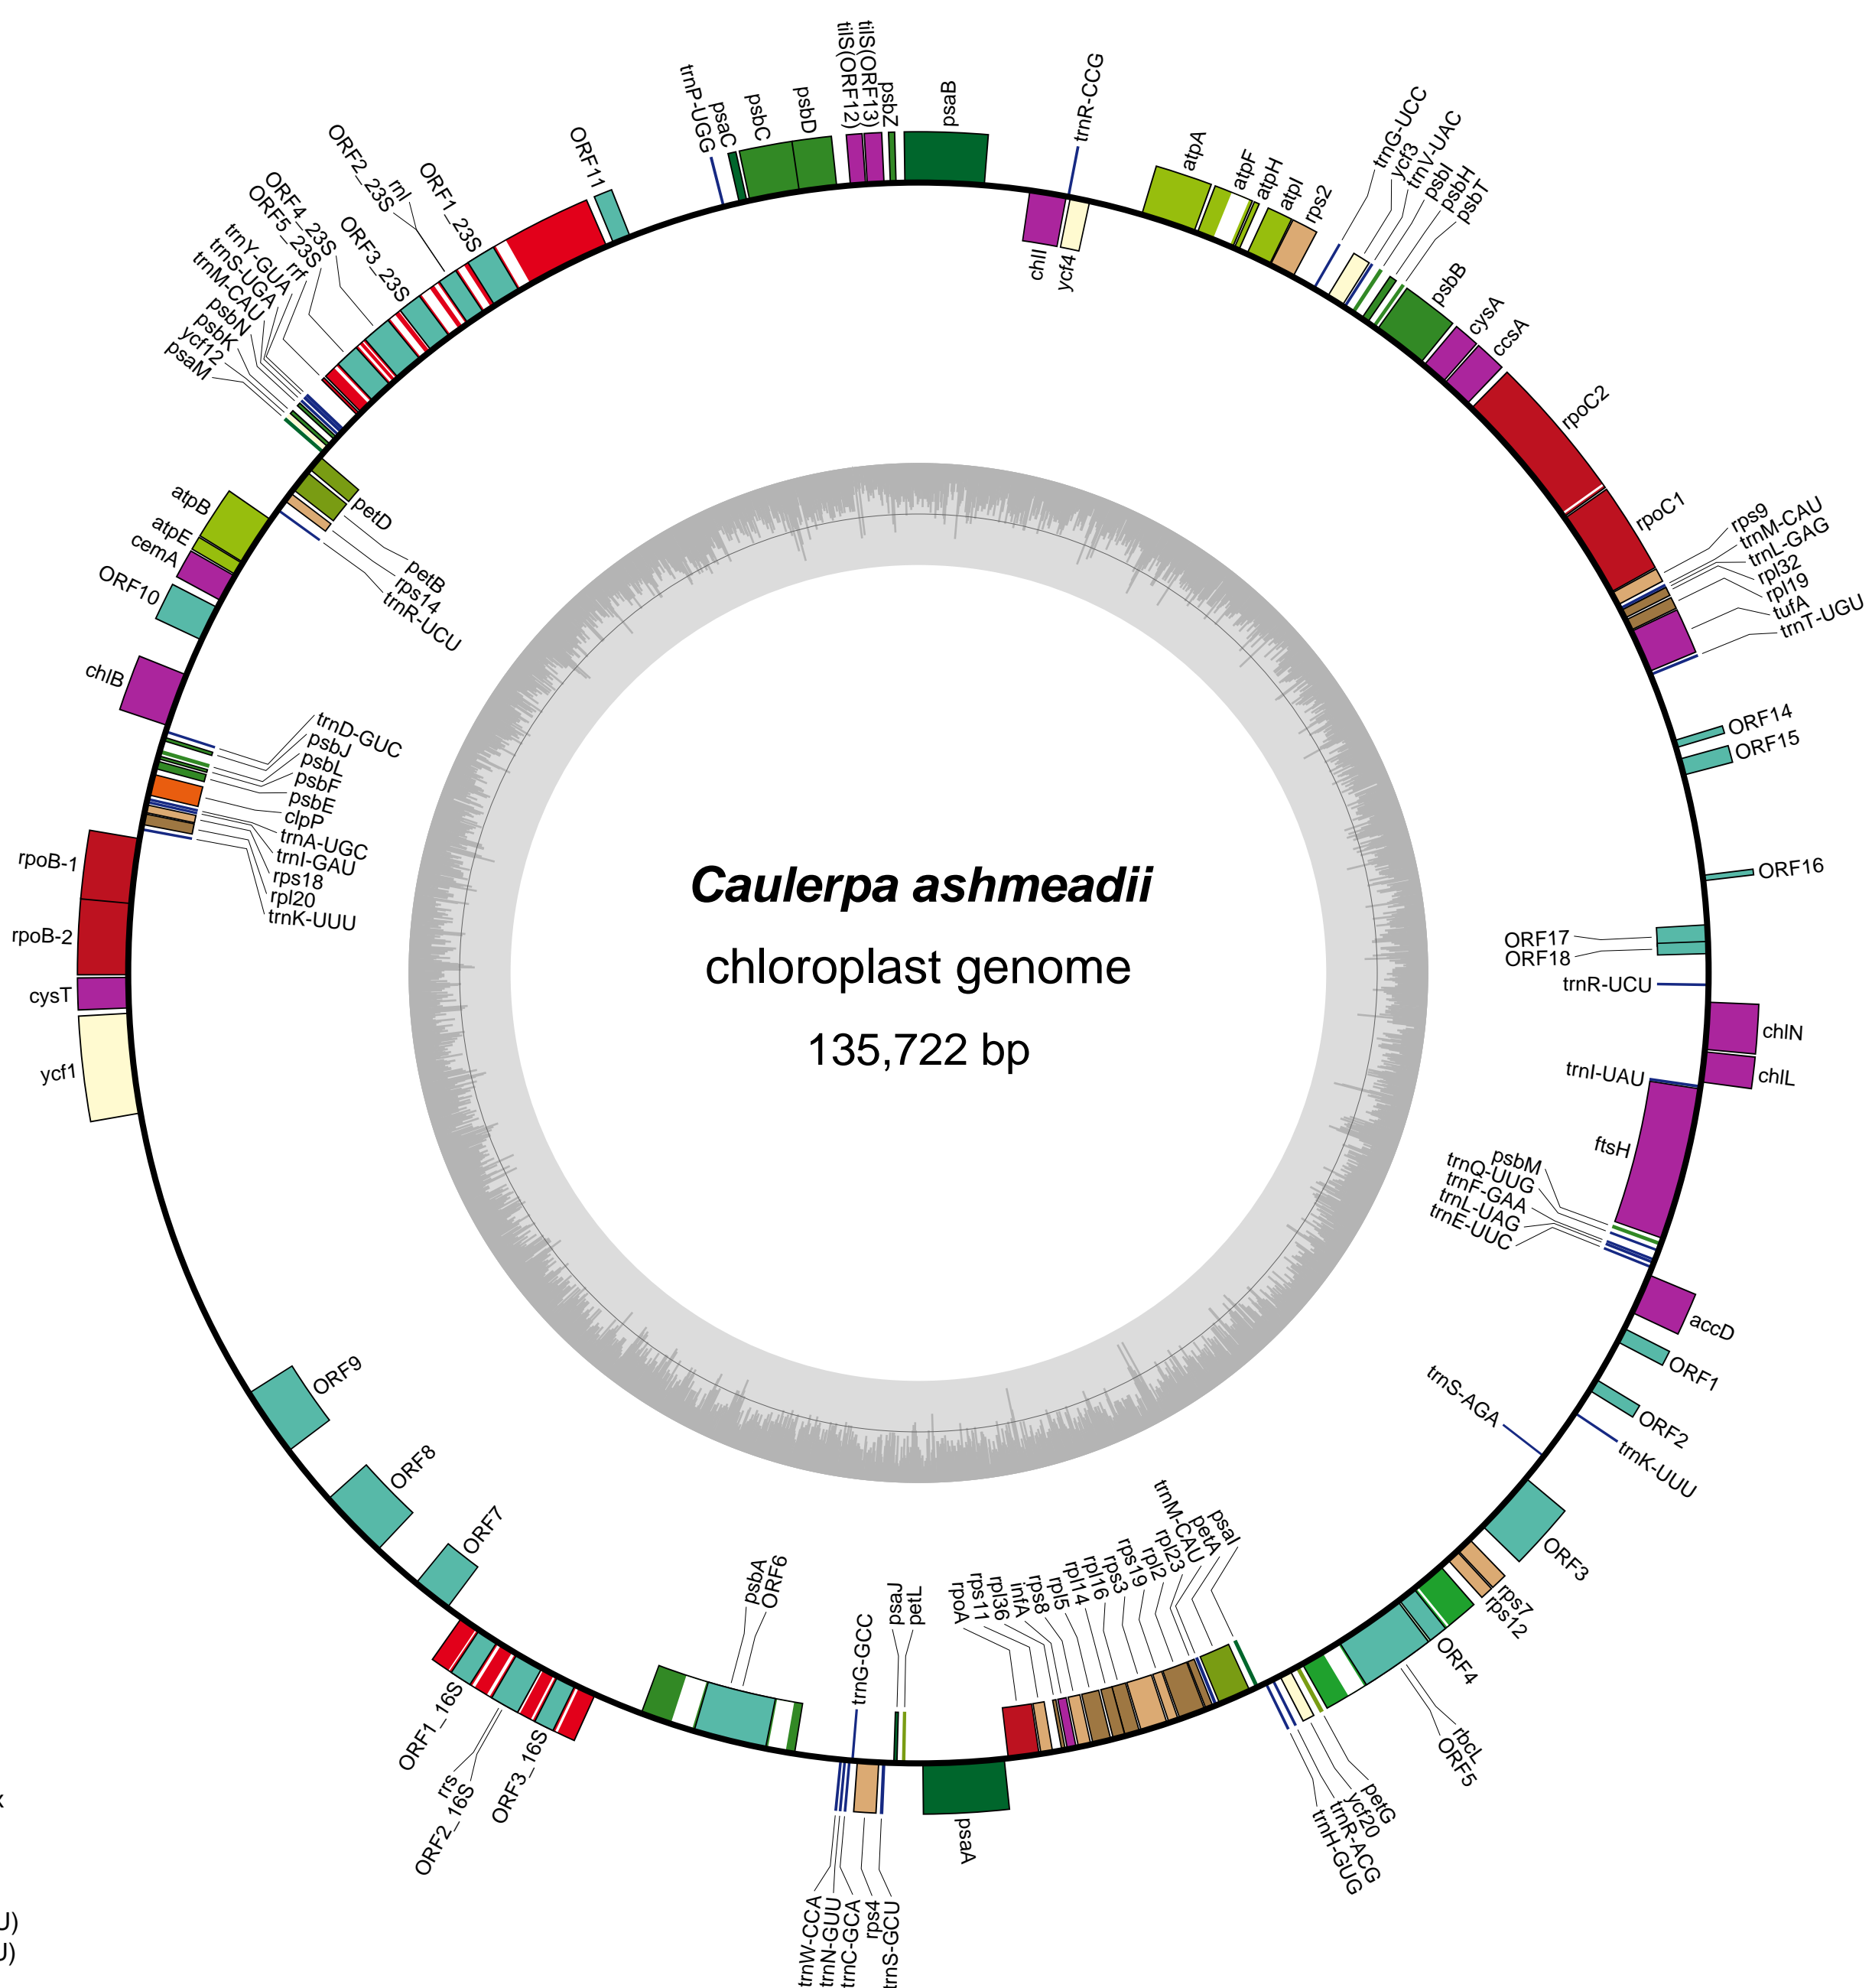

- photosystem I
- photosystem II
- cytochrome b/f complex
- ATP synthase
- RubisCO large subunit
- RNA polymerase
- ribosomal proteins (SSU)
- ribosomal proteins (LSU)
- clpP, matK
- other genes
- hypothetical chloroplast reading frames (ycf)
- ORFs
- transfer RNAs
- ribosomal RNAs
- introns
