# Supplementary material for: Promising prospects of nanopore sequencing for algal hologenomics and structural variation discovery
Source: PubMed Central journal article supplement (PMC6854639; doi:10.1186/s12864-019-6248-2), 2019-11-13
Supplement: 12864_2019_6248_MOESM7_ESM.pdf [file 12864_2019_6248_MOESM7_ESM.pdf]

(a) All data

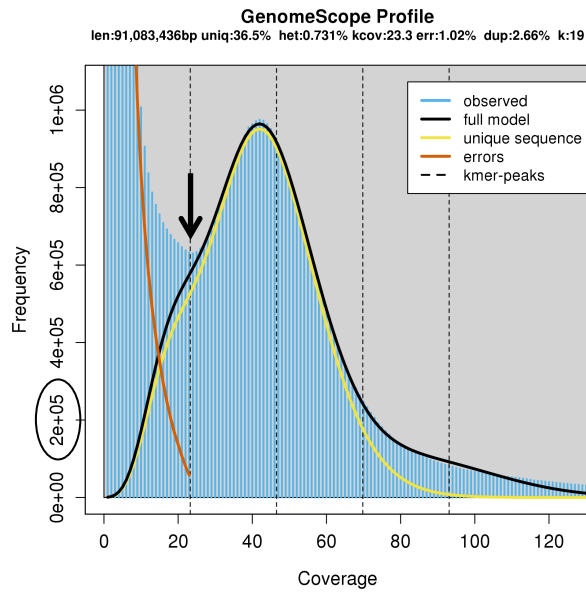

(c) Depleted of bacterial reads

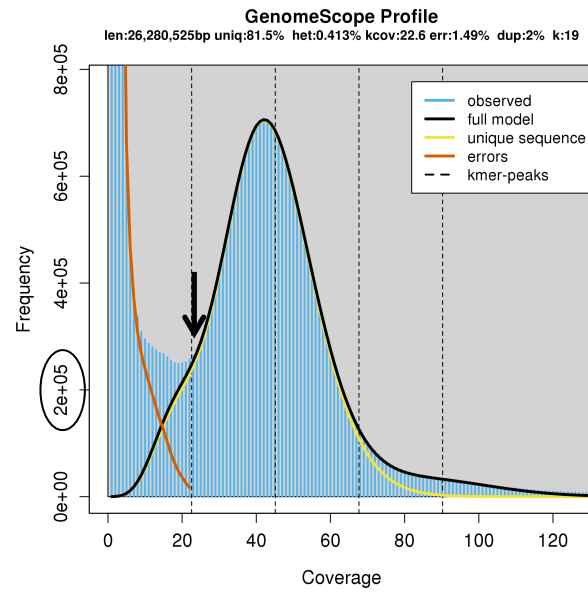

(e) Depleted of nuclear reads

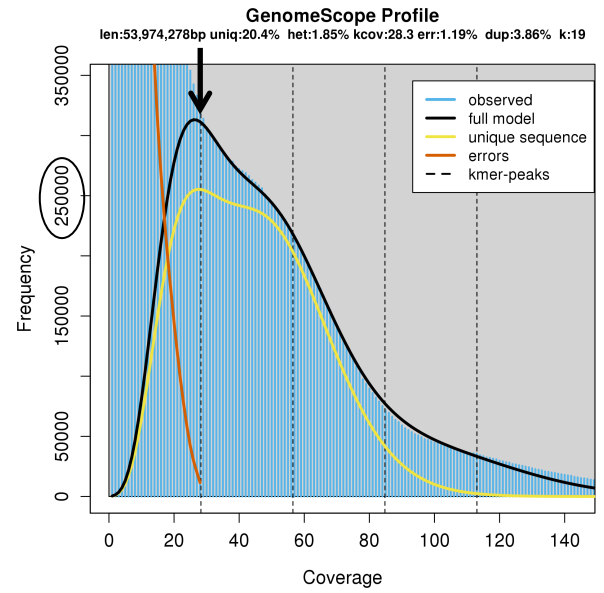

(b)

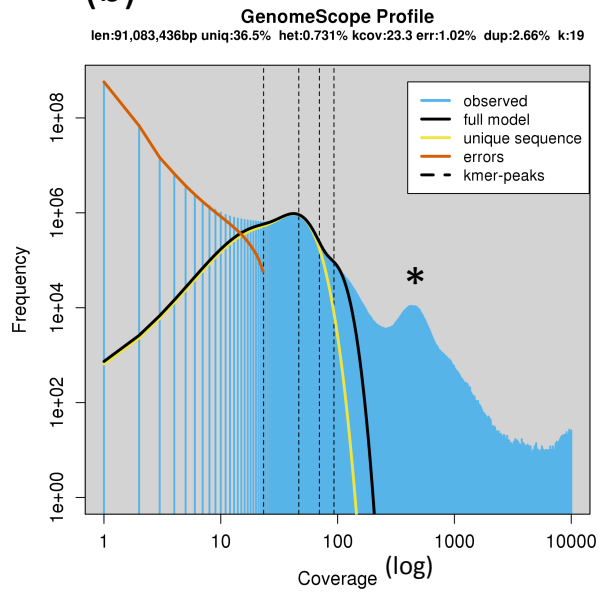

(d)

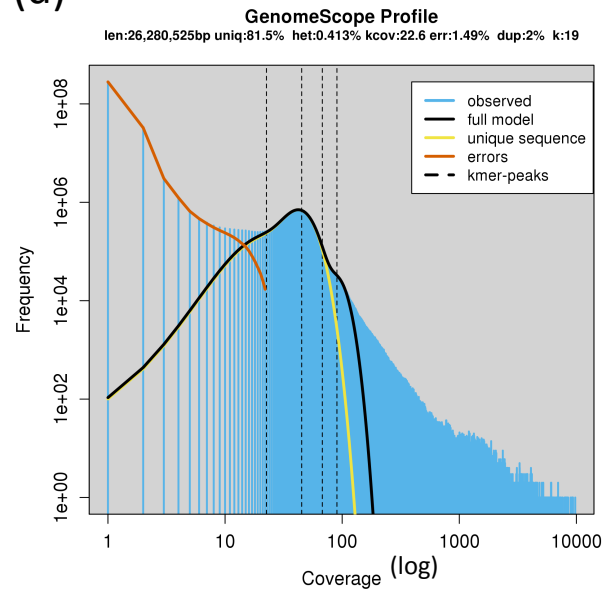

(f)

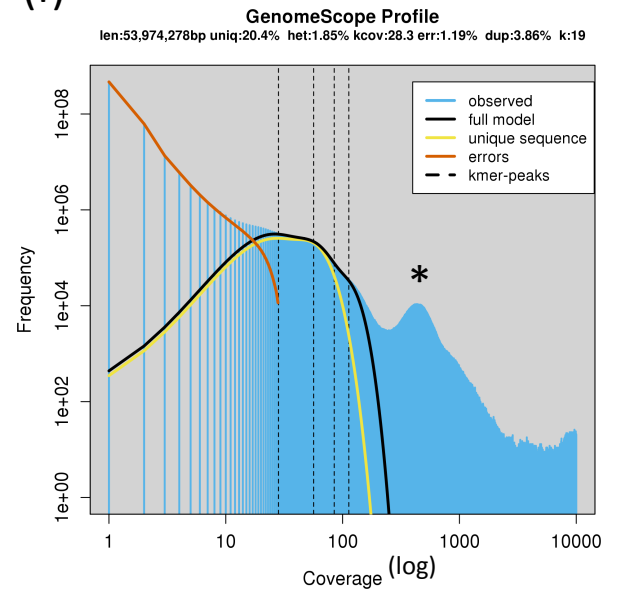

GenomeScope version 1.0

k = 19

| property              | min           | max           |
|-----------------------|---------------|---------------|
| Heterozygosity        | 0.409485%     | 0.416116%     |
| Genome Haploid Length | 26,268,957 bp | 26,280,525 bp |
| Genome Repeat Length  | 4,867,943 bp  | 4,870,086 bp  |
| Genome Unique Length  | 21,401,014 bp | 21,410,439 bp |
| Model Fit             | 97.5292%      | 99.2466%      |
| Read Error Rate       | 1.49446%      | 1.49446%      |
