# Supplementary material for: Promising prospects of nanopore sequencing for algal hologenomics and structural variation discovery
Source: PubMed Central journal article supplement (PMC6854639; doi:10.1186/s12864-019-6248-2), 2019-11-13

PE+1Df

PE

PE+2D

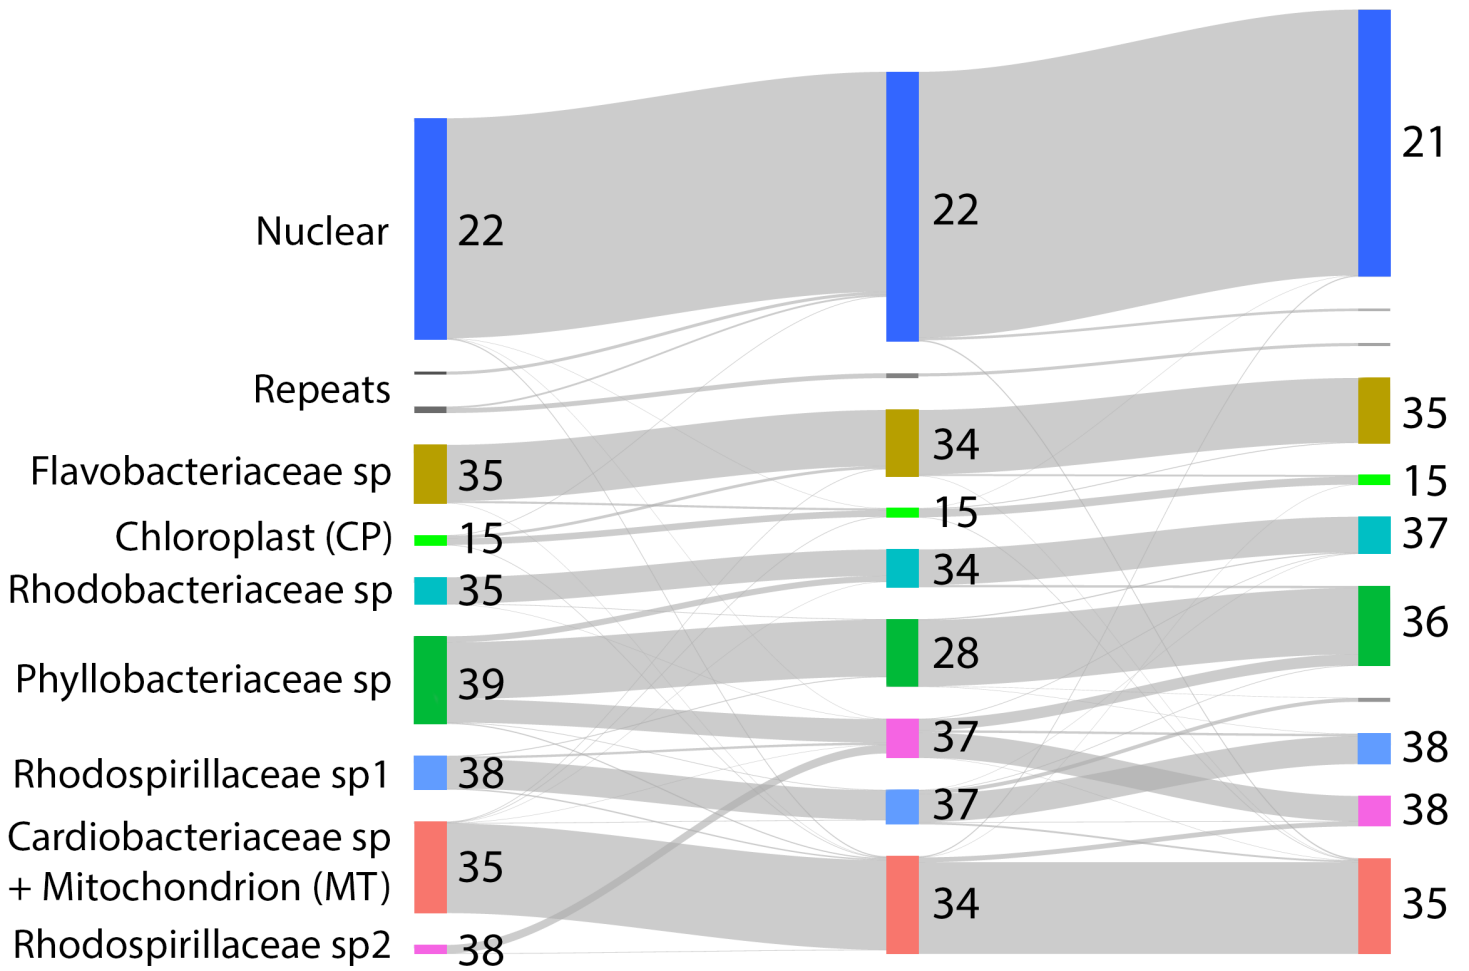

Supplement: 12864_2019_6248_MOESM8_ESM.pdf [file 12864_2019_6248_MOESM8_ESM.pdf]
