# Supplementary material for: Promising prospects of nanopore sequencing for algal hologenomics and structural variation discovery
Source: PubMed Central journal article supplement (PMC6854639; doi:10.1186/s12864-019-6248-2), 2019-11-13
Supplement: 12864_2019_6248_MOESM12_ESM.pdf [file 12864_2019_6248_MOESM12_ESM.pdf]

BLASTN 2.9.0+

Reference: Stephen F. Altschul, Thomas L. Madden, Alejandro A. Schaffer, Jinghui Zhang, Zheng Zhang, Webb Miller, and David J. Lipman (1997), "Gapped BLAST and PSI-BLAST: a new generation of protein database search programs", Nucleic Acids Res. 25:3389-3402.

RID: 9AC73PMW114

Query= atp1

Length=864

| Sequences producing significant alignments: | Score (Bits) | E Value | Max ident |
|---------------------------------------------|--------------|---------|-----------|
| Query_75155 atpA                            | 343          | 4e-98   | 69%       |

ALIGNMENTS

>Query\_75155 atpA  
Length=1533

Score = 343 bits (380), Expect = 4e-98  
Identities = 578/832 (69%), Gaps = 26/832 (3%)  
Strand=Plus/Plus

|            |                                                               |      |
|------------|---------------------------------------------------------------|------|
| Query 40   | GCCCCGGGATTATTGCTCGCCGTTCTGTACACGAGCCGATGCAAACCTGGAATTAAGCT   | 99   |
| Sbjct 403  | GCACCTGGTATTATTGCACGACAATCTGTTTTGAACCATTACAACAGGGCTGTAGCT     | 462  |
| Query 100  | GTGGATAGTCTGGTCCCATCGGCCGTGGTCAACGGGAATTAATTATTGGGGATCGTCAA   | 159  |
| Sbjct 463  | ATCGATTCTATGATTCTATAGGTAGAGGGCAACGAGAATTAATTATTGGTGATAGACAA   | 522  |
| Query 160  | ACCGGTAAAACAGCAATCGCTTTGGATACTATTTTGAATCAAAAACACAACACTGGAGAG  | 219  |
| Sbjct 523  | ACAGGAAAACATCAATCGCTGTTGATACTATTTTGAATCAAAAAGGTAATCTG-----    | 577  |
| Query 220  | GCTCAGCTCTATTGTGTCTATGTGGCCATTGGTCAAAAACGGTCAACCGTGGCCCA-GTT  | 278  |
| Sbjct 578  | -----TTTATTGCAATTTATGTAGCTATTGGACAAAAGCTTCTCTATTGCTCAAGTT     | 630  |
| Query 279  | GGTAAAAATTTTATCTGACGCTCAGGCAATGGAGTATACCACTGTAGTGGCTGCCACGGC  | 338  |
| Sbjct 631  | GTTTCGACTTTAAAGAAACAAGG-GGCTATGGAATATACTATTATTGTTGCTGCACCAGC  | 689  |
| Query 339  | CTCAGAT---CCCGCGCCTTTACAGTTTTTAGCACCTTATACTGGATGTGCTATATCTGA  | 395  |
| Sbjct 690  | ---AGATTCTCCAGCTACTTTACAATATTTAGCTCCTTATACTGGTGCTACTTTGGCAGA  | 746  |
| Query 396  | ATTTTTCCGGGATAATGGTATGCATGCGCTCATTATTTTCGATGATCTCAGCAAAACAAAG | 455  |
| Sbjct 747  | ATATTTTCATGTATAAAGGAGGTACATACCTTGTGATTTATGATGATTTATCTAAACAAGC | 806  |
| Query 456  | TGTGGCCTATAGGCAATGTCACTATTGTTGCGTCGACCTCCCGGTAGAGAGGCGTTTCC   | 515  |
| Sbjct 807  | TCAAGCTTATAGAGAAATGTCTTTACTTTTAAGACGACCACCTGGTCGTGAAGCTTTTCC  | 866  |
| Query 516  | AGGAGATGTATTTTATCTTCATAGTCGACTACTTGAACGGGCTGCGAAACTAAGTGATAC  | 575  |
| Sbjct 867  | TGGGGATGTTTTTATCTTCATTCAAGACTTTTAGAACGGGCAGCAAACTGAATAAACA    | 926  |
| Query 576  | ACTAGGAGCAGGCAGTATGACCGCCTTACCTATCATTGAAACACAATCGGGGGATGTGTC  | 635  |
| Sbjct 927  | AATGGGTGGAGGTAGTATGACAGCTCTTCTATTGTTGAAACACAAGAAGGAGATGTATC   | 986  |
| Query 636  | GGCTTATATTCTACCAATGTGATTTGATTACTGATGGACAAAATTCCTGGAAACATC     | 695  |
| Sbjct 987  | TGCTTATATTCCAACAAATGTAATTTCTATTACTGATGGACAGATTTTTTT---ATCAGC  | 1043 |
| Query 696  | A-CTATTTT---ATAAAGGTATTCGTCAGCAATTAATGTGGGAATTTCTGTGAGTCGTGT  | 752  |
| Sbjct 1044 | AGATATTTTTAATAGTGAATTCTGCCAGCTATTAATGTTGGTATTTCTGTTTCTCGTGT   | 1103 |
