# Supplementary material for: Promising prospects of nanopore sequencing for algal hologenomics and structural variation discovery
Source: PubMed Central journal article supplement (PMC6854639; doi:10.1186/s12864-019-6248-2), 2019-11-13
Supplement: 12864_2019_6248_MOESM16_ESM.pdf [file 12864_2019_6248_MOESM16_ESM.pdf]

## BLASTP 2.10.0+

Reference: Stephen F. Altschul, Thomas L. Madden, Alejandro A. Schaffer, Jinghui Zhang, Zheng Zhang, Webb Miller, and David J. Lipman (1997), "Gapped BLAST and PSI-BLAST: a new generation of protein database search programs", *Nucleic Acids Res.* 25:3389-3402.

Reference for compositional score matrix adjustment: Stephen F. Altschul, John C. Wootton, E. Michael Gertz, Richa Agarwala, Aleksandr Morgulis, Alejandro A. Schaffer, and Yi-Kuo Yu (2005) "Protein database searches using compositionally adjusted substitution matrices", *FEBS J.* 272:5101-5109.

RID: SA1045XE01R

Database: All non-redundant GenBank CDS translations+PDB+SwissProt+PIR+PRF excluding environmental samples from WGS projects  
234,979,574 sequences; 84,697,594,569 total letters

#####

Query= ORF6

Length=683

| Sequences producing significant alignments:                       | Score (Bits) | E Value | Max Ident |
|-------------------------------------------------------------------|--------------|---------|-----------|
| YP_009519247.1 hypothetical protein [Caulerpa verticillata]       | 1040         | 0.0     | 73%       |
| AOP19042.1 hypothetical protein [Halimeda discoidea]              | 873          | 0.0     | 61%       |
| YP_009514393.1 hypothetical protein [Caulerpa lentillifera]       | 378          | 2e-123  | 64%       |
| ARR28427.1 hypothetical protein [Caulerpa okamurae]               | 376          | 7e-123  | 65%       |
| AL020849.1 HNH endonuclease [Chlamydomonas nivalis]               | 366          | 2e-113  | 35%       |
| YP_009519478.1 hypothetical protein [Rhipiliopsis peltata]        | 350          | 2e-107  | 37%       |
| YP_009184986.1 putative reverse transcriptase, maturase and HN... | 339          | 2e-102  | 34%       |
| AL020843.1 hypothetical protein [Chlamydomonas nivalis]           | 328          | 6e-100  | 37%       |
| AW168212.1 hypothetical protein [Pediastrum angulosum]            | 332          | 8e-100  | 34%       |
| AOC61484.1 putative reverse transcriptase and intron maturase ... | 323          | 8e-98   | 33%       |
| WP_136982224.1 nicotine oxidoreductase [Vibrio sp. F13]           | 321          | 6e-97   | 34%       |
| QDR25075.1 putative reverse transcriptase and intron maturase ... | 320          | 1e-96   | 35%       |
| YP_009472852.1 hypothetical protein [Caulerpa manorensis]         | 319          | 3e-96   | 34%       |
| WP_042082597.1 hypothetical protein [Aeromonas veronii]           | 317          | 2e-95   | 34%       |
| WP_113736215.1 MULTISPECIES: hypothetical protein [Aeromonas]     | 315          | 9e-95   | 34%       |
| WP_144502814.1 group II intron reverse transcriptase/maturase ... | 315          | 1e-94   | 36%       |
| WP_003459374.1 nicotine oxidoreductase [Pseudomonas aeruginosa]   | 315          | 1e-94   | 35%       |
| WP_130241175.1 nicotine oxidoreductase [Vibrio vulnificus]        | 315          | 1e-94   | 34%       |
| AYE93200.1 hypothetical protein C0995_000022 [Termitomyces sp.]   | 318          | 1e-94   | 35%       |
| WP_087983616.1 group II intron reverse transcriptase/maturase ... | 314          | 2e-94   | 36%       |
| YP_009184874.1 putative reverse transcriptase, intron maturase... | 313          | 5e-94   | 35%       |
| WP_104323339.1 nicotine oxidoreductase [Marinobacter sp. N4]      | 313          | 8e-94   | 33%       |
| WP_078557596.1 hypothetical protein [Vibrio parahaemolyticus]     | 313          | 8e-94   | 33%       |
| WP_124886972.1 nicotine oxidoreductase [Burkholderia stagnalis]   | 313          | 9e-94   | 32%       |
| WP_085917292.1 nicotine oxidoreductase [Halomonas sp. CSM-2]      | 312          | 1e-93   | 34%       |
| WP_113624435.1 MULTISPECIES: nicotine oxidoreductase [Vibrio]     | 312          | 1e-93   | 33%       |
| WP_017684078.1 hypothetical protein [Pseudomonas syringae]        | 312          | 1e-93   | 35%       |
| WP_017703896.1 hypothetical protein [Pseudomonas syringae]        | 312          | 1e-93   | 35%       |
| WP_085714244.1 hypothetical protein [Pseudomonas syringae]        | 311          | 2e-93   | 35%       |
| WP_103653046.1 group II intron reverse transcriptase/maturase ... | 310          | 5e-93   | 36%       |
| WP_044046873.1 nicotine oxidoreductase [Pseudomonas putida]       | 310          | 1e-92   | 34%       |
| YP_009367524.1 putative reverse transcriptase and intron matur... | 310          | 1e-92   | 33%       |
| WP_098472746.1 group II intron reverse transcriptase/maturase ... | 309          | 1e-92   | 36%       |
| WP_095037225.1 MULTISPECIES: nicotine oxidoreductase [Pseudomo... | 309          | 2e-92   | 33%       |
| WP_021728157.1 MULTISPECIES: Reverse transcriptase / RNA matur... | 309          | 2e-92   | 36%       |
| AMX22269.1 hypothetical protein [Cryphonectria parasitica]        | 312          | 6e-92   | 34%       |
| ATI20475.1 group II intron reverse transcriptase/maturase [Jug... | 312          | 8e-92   | 34%       |
| WP_076775706.1 group II intron reverse transcriptase/maturase ... | 307          | 8e-92   | 35%       |
| AEJ10966.1 nicotine oxidoreductase [Pseudomonas putida S16]       | 309          | 9e-92   | 34%       |
| TMD92013.1 RNA-dependent DNA polymerase [Chloroflexi bacterium]   | 307          | 1e-91   | 32%       |
| WP_016078729.1 hypothetical protein [Bacillus cereus]             | 307          | 1e-91   | 36%       |
| KHD04731.1 hypothetical protein PN36_19900 [Candidatus Thiomar... | 307          | 1e-91   | 33%       |
| CAA38781.1 reverse transcriptase homologue COI iA grp II prote... | 311          | 1e-91   | 34%       |
| TMC24583.1 RNA-dependent DNA polymerase [Chloroflexi bacterium]   | 306          | 2e-91   | 32%       |
| WP_114292142.1 hypothetical protein [Sulfitobacter sp. PIC-76]    | 307          | 2e-91   | 33%       |
| AMX22256.1 hypothetical protein [Cryphonectria parasitica]        | 311          | 2e-91   | 33%       |
| WP_106082431.1 group II intron reverse transcriptase/maturase ... | 305          | 3e-91   | 36%       |
| WP_001149933.1 MULTISPECIES: maturase [Bacillus cereus group]     | 305          | 3e-91   | 36%       |
| AK077651.1 hypothetical protein EN12_21235 [Vibrio cholerae]      | 306          | 4e-91   | 32%       |
| WP_016090496.1 hypothetical protein [Bacillus cereus]             | 305          | 4e-91   | 35%       |
| WP_099686794.1 group II intron reverse transcriptase/maturase ... | 305          | 5e-91   | 36%       |
| WP_144533802.1 group II intron reverse transcriptase/maturase ... | 305          | 5e-91   | 36%       |
| WP_114134779.1 hypothetical protein [Cupriavidus necator]         | 305          | 7e-91   | 31%       |

|                |                                                         |     |       |     |
|----------------|---------------------------------------------------------|-----|-------|-----|
| WP_001149934.1 | MULTISPECIES: maturase [Bacillus cereus group]          | 304 | 1e-90 | 35% |
| WP_007922378.1 | RNA-directed DNA polymerase [Ktedonobacter race...]     | 304 | 1e-90 | 33% |
| WP_098537552.1 | group II intron reverse transcriptase/maturase ...      | 304 | 1e-90 | 35% |
| TMD28872.1     | RNA-dependent DNA polymerase [Chloroflexi bacterium]    | 304 | 1e-90 | 33% |
| WP_097920007.1 | group II intron reverse transcriptase/maturase ...      | 304 | 1e-90 | 35% |
| WP_048561943.1 | maturase [Bacillus cereus]                              | 303 | 2e-90 | 35% |
| WP_001149935.1 | MULTISPECIES: maturase [Bacillus cereus group]          | 303 | 3e-90 | 35% |
| WP_044798328.1 | MULTISPECIES: maturase [Bacillus]                       | 303 | 3e-90 | 35% |
| WP_129893139.1 | RNA-dependent DNA polymerase [Ktedonobacterales...]     | 305 | 3e-90 | 32% |
| WP_114946279.1 | hypothetical protein [Microvirga sp. CCBAU 65841]       | 303 | 3e-90 | 33% |
| WP_089608005.1 | group II intron reverse transcriptase/maturase ...      | 302 | 5e-90 | 35% |
| WP_098442215.1 | group II intron reverse transcriptase/maturase ...      | 302 | 5e-90 | 35% |
| WP_033698193.1 | maturase [Bacillus thuringiensis]                       | 302 | 6e-90 | 35% |
| WP_016099972.1 | hypothetical protein [Bacillus cereus]                  | 302 | 7e-90 | 35% |
| WP_044157303.1 | maturase [Bacillus thuringiensis]                       | 302 | 9e-90 | 35% |
| SFF27114.1     | group II intron reverse transcriptase/maturase [Aci...] | 302 | 9e-90 | 32% |
| GBH18395.1     | Retron-type reverse transcriptase [Pseudomonas syri...] | 301 | 9e-90 | 35% |
| WP_007914005.1 | RNA-directed DNA polymerase [Ktedonobacter race...]     | 302 | 1e-89 | 33% |
| WP_092941870.1 | hypothetical protein [Acidovorax wautersii]             | 301 | 1e-89 | 32% |
| WP_119684256.1 | group II intron reverse transcriptase/maturase ...      | 301 | 1e-89 | 35% |
| YP_009492182.1 | hypothetical protein [Pseudopediastrum integrum]        | 303 | 1e-89 | 31% |
| WP_074644204.1 | MULTISPECIES: group II intron reverse transcrip...]     | 301 | 2e-89 | 35% |
| WP_016097415.1 | hypothetical protein [Bacillus cereus]                  | 301 | 2e-89 | 35% |
| WP_098344211.1 | group II intron reverse transcriptase/maturase ...      | 301 | 2e-89 | 35% |
| WP_007921601.1 | RNA-directed DNA polymerase [Ktedonobacter race...]     | 301 | 2e-89 | 33% |
| WP_007914435.1 | RNA-directed DNA polymerase [Ktedonobacter race...]     | 301 | 2e-89 | 33% |
| WP_007921348.1 | RNA-directed DNA polymerase [Ktedonobacter race...]     | 301 | 3e-89 | 33% |
| WP_087947829.1 | group II intron reverse transcriptase/maturase ...      | 300 | 4e-89 | 35% |
| WP_119782079.1 | group II intron reverse transcriptase/maturase ...      | 300 | 4e-89 | 35% |
| WP_128267365.1 | group II intron reverse transcriptase/maturase ...      | 300 | 4e-89 | 35% |
| AAA32006.2     | cytochrome c oxidase subunit I [Podospira anserina]     | 305 | 5e-89 | 33% |
| TMC21115.1     | RNA-dependent DNA polymerase [Chloroflexi bacterium]    | 300 | 7e-89 | 32% |
| OZ038125.1     | hypothetical protein CGU41_19175 [Pseudomonas aerug...] | 299 | 2e-88 | 33% |
| YP_009550009.1 | Reverse transcriptase COI ialpha grpII protein ...      | 303 | 2e-88 | 34% |
| WP_125908501.1 | group II intron reverse transcriptase/maturase ...      | 298 | 2e-88 | 33% |
| WP_098156398.1 | MULTISPECIES: group II intron reverse transcrip...]     | 298 | 2e-88 | 35% |
| YP_009420548.1 | hypothetical protein [Ulva pertusa]                     | 300 | 2e-88 | 34% |
| WP_038663527.1 | nicotine oxidoreductase [Pseudomonas stutzeri]          | 298 | 3e-88 | 33% |
| WP_088338955.1 | group II intron reverse transcriptase/maturase ...      | 298 | 3e-88 | 34% |
| QDP17704.1     | reverse transcriptase domain-containing protein [Sc...] | 303 | 3e-88 | 33% |
| TX128265.1     | hypothetical protein E6069_16610 [Pseudomonas alcal...] | 298 | 3e-88 | 33% |
| WP_123634498.1 | hypothetical protein [Marinobacter sp. R17]             | 297 | 5e-88 | 33% |
| WP_060567105.1 | nicotine oxidoreductase [Massilia sp. WG5]              | 297 | 7e-88 | 32% |
| WP_098099224.1 | group II intron reverse transcriptase/maturase ...      | 295 | 2e-87 | 35% |
| WP_106103073.1 | group II intron reverse transcriptase/maturase ...      | 295 | 2e-87 | 35% |
| YP_002600927.1 | putative reverse transcriptase and intron matur...]     | 295 | 2e-87 | 33% |
| SCI19716.1     | Group II intron-encoded protein ltrA [uncultured Ru...] | 295 | 2e-87 | 32% |

#####

Query= ORF20

Length=603

| Sequences producing significant alignments: | Score (Bits)                                              | E Value | Max Ident |     |
|---------------------------------------------|-----------------------------------------------------------|---------|-----------|-----|
| YP_009185223.1                              | putative reverse transcriptase, intron maturase...        | 430     | 6e-140    | 39% |
| YP_636002.1                                 | intron-encoded reverse transcriptase [Tetrademus ...]     | 418     | 1e-135    | 39% |
| ASY96128.1                                  | Group II intron-encoded protein LtrA [Tetrademus o...]    | 407     | 4e-131    | 38% |
| P19593.1                                    | RecName: Full=Probable reverse transcriptase [Tetrade...] | 392     | 1e-125    | 37% |
| YP_009519136.1                              | hypothetical protein [Caulerpa verticillata]              | 346     | 1e-113    | 97% |
| YP_009463644.1                              | RNA-dependent DNA polymerase [Haematococcus lac...]       | 313     | 7e-97     | 39% |
| AL021699.1                                  | putative HNH endonuclease [Stephanosphaera pluvialis]     | 288     | 7e-86     | 35% |
| YP_009326792.1                              | hypothetical protein [Caulerpa racemosa]                  | 254     | 1e-72     | 33% |
| AKF33562.1                                  | hypothetical protein [Ulva sp. UNA00071828]               | 249     | 4e-71     | 31% |
| YP_009519201.1                              | hypothetical protein [Caulerpa verticillata]              | 236     | 8e-71     | 65% |
| YP_009519135.1                              | hypothetical protein [Caulerpa verticillata]              | 229     | 5e-69     | 85% |
| ARR28461.1                                  | hypothetical protein [Caulerpa okamurae]                  | 241     | 9e-68     | 33% |
| AYE93292.1                                  | DNA polymerase [Termitomyces sp.]                         | 239     | 2e-67     | 31% |
| BAY52511.1                                  | maturase reverse transcriptase [Thermosynechococcus...]   | 233     | 3e-65     | 31% |
| WP_126987904.1                              | group II intron reverse transcriptase/maturase ...        | 233     | 4e-65     | 31% |
| YP_009519200.1                              | hypothetical protein [Caulerpa verticillata]              | 220     | 4e-65     | 66% |
| WP_134015154.1                              | group II intron reverse transcriptase/maturase ...        | 232     | 6e-65     | 30% |
| WP_045994405.1                              | group II intron reverse transcriptase/maturase ...        | 232     | 6e-65     | 30% |
| WP_049396991.1                              | group II intron reverse transcriptase/maturase ...        | 232     | 8e-65     | 32% |
| WP_109337812.1                              | group II intron reverse transcriptase/maturase ...        | 232     | 9e-65     | 32% |
| WP_107231717.1                              | MULTISPECIES: group II intron reverse transcrip...]       | 231     | 1e-64     | 32% |
| WP_032957202.1                              | group II intron reverse transcriptase/maturase ...        | 231     | 2e-64     | 32% |
| WP_071229638.1                              | MULTISPECIES: group II intron reverse transcrip...]       | 230     | 4e-64     | 31% |
| WP_020429325.1                              | group II intron reverse transcriptase/maturase ...        | 229     | 8e-64     | 31% |
| WP_061057251.1                              | group II intron reverse transcriptase/maturase ...        | 229     | 9e-64     | 32% |
| WP_011055886.1                              | group II intron reverse transcriptase/maturase ...        | 229     | 1e-63     | 31% |
| WP_143682674.1                              | group II intron reverse transcriptase/maturase ...        | 229     | 1e-63     | 31% |
| WP_011057003.1                              | group II intron reverse transcriptase/maturase ...        | 229     | 2e-63     | 31% |
| WP_011056164.1                              | group II intron reverse transcriptase/maturase ...        | 229     | 2e-63     | 31% |
| WP_011055969.1                              | group II intron reverse transcriptase/maturase ...        | 228     | 2e-63     | 31% |

|                |                                                         |     |       |     |
|----------------|---------------------------------------------------------|-----|-------|-----|
| YP_009240571.1 | RNA-dependent DNA polymerase [Pyronema omphalodes]      | 229 | 4e-63 | 30% |
| WP_061057252.1 | group II intron reverse transcriptase/maturase ...      | 228 | 5e-63 | 32% |
| TQF64774.1     | reverse transcriptase [Pyrrhoderma noxium]              | 228 | 6e-63 | 30% |
| WP_075988062.1 | group II intron reverse transcriptase/maturase ...      | 227 | 7e-63 | 32% |
| WP_126984859.1 | group II intron reverse transcriptase/maturase ...      | 226 | 1e-62 | 30% |
| WP_089681253.1 | group II intron reverse transcriptase/maturase ...      | 225 | 1e-62 | 31% |
| BAY51406.1     | reverse transcriptase [Thermosynechococcus vulcanus...] | 226 | 2e-62 | 30% |
| WP_087388264.1 | group II intron reverse transcriptase/maturase ...      | 226 | 2e-62 | 34% |
| WP_117475412.1 | group II intron reverse transcriptase/maturase ...      | 225 | 4e-62 | 34% |
| WP_122333818.1 | group II intron reverse transcriptase/maturase ...      | 225 | 4e-62 | 34% |
| WP_007844350.1 | MULTISPECIES: group II intron reverse transcrip...      | 224 | 4e-62 | 34% |
| AYE93236.1     | hypothetical protein C0995_000069 [Termitomyces sp.]    | 225 | 5e-62 | 30% |
| WP_117899849.1 | group II intron reverse transcriptase/maturase ...      | 224 | 1e-61 | 34% |
| WP_072677698.1 | group II intron reverse transcriptase/maturase ...      | 224 | 1e-61 | 32% |
| ECA5087620.1   | group II intron reverse transcriptase/maturase [S...]   | 222 | 3e-61 | 31% |
| OJT01524.1     | group II intron reverse transcriptase/maturase [Mar...] | 221 | 4e-61 | 32% |
| WP_040153628.1 | group II intron reverse transcriptase/maturase ...      | 221 | 7e-61 | 29% |
| EAP5604862.1   | group II intron reverse transcriptase/maturase [S...]   | 221 | 9e-61 | 31% |
| WP_096036791.1 | group II intron reverse transcriptase/maturase ...      | 219 | 1e-60 | 32% |
| NP_150378.1    | hypothetical protein PylloMp02 [Pylaiella littoralis]   | 221 | 1e-60 | 31% |
| WP_102451446.1 | group II intron reverse transcriptase/maturase ...      | 219 | 2e-60 | 32% |
| WP_001930107.1 | group II intron reverse transcriptase/maturase ...      | 220 | 2e-60 | 31% |
| EBZ5772484.1   | group II intron reverse transcriptase/maturase [S...]   | 220 | 2e-60 | 31% |
| WP_027697944.1 | group II intron reverse transcriptase/maturase ...      | 220 | 2e-60 | 31% |
| EBA4495834.1   | group II intron reverse transcriptase/maturase [S...]   | 220 | 3e-60 | 30% |
| WP_007462986.1 | group II intron reverse transcriptase/maturase ...      | 220 | 3e-60 | 30% |
| WP_048899869.1 | group II intron reverse transcriptase/maturase ...      | 219 | 4e-60 | 32% |
| WP_102559542.1 | group II intron reverse transcriptase/maturase ...      | 218 | 4e-60 | 32% |
| EBG5206135.1   | group II intron reverse transcriptase/maturase [S...]   | 219 | 5e-60 | 30% |
| WP_001727958.1 | group II intron reverse transcriptase/maturase ...      | 219 | 5e-60 | 31% |
| WP_065300429.1 | group II intron reverse transcriptase/maturase ...      | 218 | 5e-60 | 31% |
| WP_107193931.1 | group II intron reverse transcriptase/maturase ...      | 219 | 5e-60 | 31% |
| MIF48517.1     | group II intron reverse transcriptase/maturase [Sal...] | 219 | 5e-60 | 30% |
| WP_102547170.1 | group II intron reverse transcriptase/maturase ...      | 218 | 5e-60 | 32% |
| WP_102458767.1 | MULTISPECIES: group II intron reverse transcrip...      | 217 | 6e-60 | 32% |
| ECF1699849.1   | group II intron reverse transcriptase/maturase [S...]   | 219 | 6e-60 | 30% |
| WP_086113864.1 | group II intron reverse transcriptase/maturase ...      | 219 | 6e-60 | 30% |
| WP_136890147.1 | group II intron reverse transcriptase/maturase ...      | 219 | 7e-60 | 31% |
| WP_047885252.1 | group II intron reverse transcriptase/maturase ...      | 219 | 7e-60 | 31% |
| EAB5051756.1   | group II intron reverse transcriptase/maturase [S...]   | 219 | 7e-60 | 30% |
| EBY6522539.1   | group II intron reverse transcriptase/maturase [S...]   | 219 | 7e-60 | 30% |
| PMI99193.1     | group II intron reverse transcriptase/maturase [Vib...] | 217 | 7e-60 | 32% |
| WP_107301457.1 | group II intron reverse transcriptase/maturase ...      | 219 | 8e-60 | 31% |
| ECC9828226.1   | group II intron reverse transcriptase/maturase [S...]   | 218 | 8e-60 | 30% |
| WP_136994725.1 | group II intron reverse transcriptase/maturase ...      | 217 | 8e-60 | 32% |
| OJY90761.1     | group II intron reverse transcriptase/maturase [Xan...] | 218 | 9e-60 | 30% |
| WP_102504492.1 | group II intron reverse transcriptase/maturase ...      | 217 | 9e-60 | 32% |
| WP_102570800.1 | group II intron reverse transcriptase/maturase ...      | 217 | 9e-60 | 32% |
| EAA8323493.1   | group II intron reverse transcriptase/maturase [S...]   | 218 | 1e-59 | 30% |
| WP_148523617.1 | group II intron reverse transcriptase/maturase ...      | 218 | 1e-59 | 30% |
| WP_148505600.1 | group II intron reverse transcriptase/maturase ...      | 218 | 1e-59 | 30% |
| WP_136889514.1 | group II intron reverse transcriptase/maturase ...      | 218 | 1e-59 | 30% |
| WP_102483506.1 | group II intron reverse transcriptase/maturase ...      | 216 | 1e-59 | 32% |
| AKN39171.1     | Retron-type RNA-directed DNA polymerase [Vibrio spl...] | 218 | 1e-59 | 32% |
| WP_100874669.1 | group II intron reverse transcriptase/maturase ...      | 218 | 2e-59 | 31% |
| WP_136887894.1 | group II intron reverse transcriptase/maturase ...      | 218 | 2e-59 | 30% |
| WP_005397527.1 | MULTISPECIES: group II intron reverse transcrip...      | 217 | 2e-59 | 30% |
| CCN47380.1     | Retron-type reverse transcriptase [Vibrio nigripulc...] | 218 | 2e-59 | 30% |
| WP_068144101.1 | group II intron reverse transcriptase/maturase ...      | 218 | 2e-59 | 30% |
| KFD97154.1     | HNH endonuclease family protein [Vibrio cholerae]       | 217 | 3e-59 | 30% |
| WP_144361825.1 | group II intron reverse transcriptase/maturase ...      | 217 | 3e-59 | 31% |
| WP_038884138.1 | group II intron reverse transcriptase/maturase ...      | 217 | 3e-59 | 31% |
| EMP83513.1     | HNH endonuclease family protein [Vibrio cholerae O1...] | 217 | 3e-59 | 30% |
| EBW3237531.1   | group II intron reverse transcriptase/maturase [S...]   | 217 | 3e-59 | 31% |
| EAA4369619.1   | group II intron reverse transcriptase/maturase [S...]   | 217 | 3e-59 | 30% |
| ECC9153659.1   | group II intron reverse transcriptase/maturase [S...]   | 217 | 3e-59 | 30% |
| KXS52135.1     | RNA-directed DNA polymerase [Marinobacter sp. T13-3]    | 218 | 3e-59 | 31% |
| WP_132970156.1 | group II intron reverse transcriptase/maturase ...      | 215 | 4e-59 | 32% |
| WP_102776167.1 | MULTISPECIES: group II intron reverse transcrip...      | 217 | 4e-59 | 31% |
| WP_069216972.1 | group II intron reverse transcriptase/maturase ...      | 217 | 4e-59 | 30% |

#####

Query= ORF19

Length=265

| Sequences producing significant alignments: | Score (Bits)                                 | E Value | Max Ident |     |
|---------------------------------------------|----------------------------------------------|---------|-----------|-----|
| AY045675.1                                  | hypothetical protein [Caulerpa cupressoides] | 295     | 3e-98     | 71% |
| YP_009326793.1                              | hypothetical protein [Caulerpa racemosa]     | 256     | 9e-82     | 53% |
| YP_009519137.1                              | hypothetical protein [Caulerpa verticillata] | 241     | 6e-78     | 94% |
| YP_009519138.1                              | hypothetical protein [Caulerpa verticillata] | 182     | 8e-55     | 84% |
| YP_009519483.1                              | hypothetical protein [Rhipiliopsis peltata]  | 183     | 2e-54     | 49% |
| YP_009519202.1                              | hypothetical protein [Caulerpa verticillata] | 140     | 3e-38     | 64% |
| ASY96129.1                                  | hypothetical protein [Tetrademus obliquus]   | 99.0    | 8e-21     | 34% |

#####

Query= ORF21

Length=153

| Sequences producing significant alignments:                         | Score<br>(Bits) | E<br>Value | Max<br>Ident |
|---------------------------------------------------------------------|-----------------|------------|--------------|
| YP_009472793.1 hypothetical protein [Caulerpa manorensis]           | 259             | 6e-86      | 95%          |
| YP_009306232.1 hypothetical protein [Derbesia sp. WEST4838]         | 153             | 2e-44      | 56%          |
| AL020956.1 putative HNH homing endonuclease [Microglena monadina]   | 99.8            | 2e-23      | 39%          |
| AN046363.1 hypothetical protein [Tetraena socialis]                 | 101             | 3e-23      | 38%          |
| YP_009184809.1 putative HNH homing endonuclease [Jenufa perfor...   | 94.4            | 1e-20      | 40%          |
| AWI68513.1 putative HNH homing endonuclease [Pediastrum duplex]     | 92.0            | 1e-19      | 37%          |
| ATW62840.1 homing endonuclease [Synechococcus phage S-CBWM1]        | 77.8            | 2e-14      | 37%          |
| YP_636211.1 putative site-specific DNA endonuclease [Tupiella ...]  | 73.6            | 6e-13      | 31%          |
| YP_635978.1 putative site-specific DNA endonuclease [Tetrademus...] | 71.2            | 9e-12      | 40%          |
| YP_008770907.1 HNH homing endonuclease [Salmonella phage Maynard]   | 66.6            | 2e-10      | 56%          |
| AL020952.1 putative HNH homing endonuclease [Microglena monadina]   | 66.6            | 4e-10      | 32%          |
| AWX53465.1 hypothetical protein [Scotinosphaera sp. NIES-154]       | 66.2            | 6e-10      | 38%          |
| YP_009104998.1 putative HNH homing endonuclease [Watanabea ren...]  | 62.4            | 3e-09      | 37%          |
| YP_009491939.1 putative site-specific DNA endonuclease [Pedias...]  | 64.3            | 3e-09      | 45%          |
| YP_764437.1 putative site-specific DNA endonuclease [Stigeoclo...]  | 63.9            | 5e-09      | 50%          |
| YP_009367897.1 putative HNH homing endonuclease [Hazenina capsu...] | 63.5            | 7e-09      | 36%          |
| AL021403.1 putative HNH homing endonuclease [Golenkinia longis...]  | 62.8            | 8e-09      | 35%          |
| AIT94640.1 putative HNH homing endonuclease [Chlorosarcina bre...]  | 60.1            | 1e-08      | 36%          |
| AYN55696.1 HNH homing endonuclease [Dickeya phage Kamild]           | 62.0            | 1e-08      | 54%          |
| A0Y36013.1 putative HNH homing endonuclease [Hariotina sp. MMO...]  | 62.4            | 2e-08      | 33%          |
| YP_009364130.1 putative HNH homing endonuclease [Hydrodictyon ...]  | 60.8            | 5e-08      | 32%          |
| AL020951.1 putative HNH homing endonuclease [Microglena monadina]   | 61.2            | 6e-08      | 31%          |
| AL063172.1 putative HNH homing endonuclease [Chloromonas perfo...]  | 61.2            | 6e-08      | 35%          |
| YP_005089834.1 orf294 gene product [Dunaliella salina]              | 60.5            | 1e-07      | 36%          |
| YP_009629468.1 HNH homing endonuclease [Coelastrella saipanensis]   | 59.7            | 1e-07      | 41%          |
| YP_002000418.1 putative HNH homing endonuclease [Oedogonium ca...]  | 59.7            | 2e-07      | 31%          |
| YP_005089835.1 orf222 gene product [Dunaliella salina]              | 58.9            | 2e-07      | 37%          |
| QAU05129.1 putative homing endonuclease [Pseudomonas phage Henu5]   | 57.8            | 2e-07      | 26%          |
| ASY96103.1 hypothetical protein [Tetrademus obliquus]               | 59.3            | 3e-07      | 29%          |
| RYE21316.1 HNH endonuclease [Sphingobacteriaceae bacterium]         | 57.0            | 5e-07      | 31%          |
| AWX53130.1 hypothetical protein [Blidingia minima]                  | 57.8            | 6e-07      | 32%          |
| YP_009629473.1 putative HNH homing endonuclease [Coelastrella ...]  | 55.8            | 9e-07      | 33%          |
| YP_002000413.1 putative HNH homing endonuclease [Oedogonium ca...]  | 55.8            | 1e-06      | 36%          |
| AUR97715.1 nuclease associated modular domain 3 protein [Vibri...]  | 56.6            | 2e-06      | 42%          |
| YP_004009436.1 putative HNH family homing endonuclease [Acinet...]  | 54.7            | 4e-06      | 29%          |
| YP_002922087.1 Homing endonuclease [Escherichia phage JSE]          | 55.5            | 7e-06      | 44%          |
| YP_009280092.1 hypothetical protein MP1_gp0234 [Morganella pha...]  | 54.3            | 1e-05      | 31%          |
| AWI68321.1 putative HNH homing endonuclease [Pediastrum duplex]     | 53.1            | 2e-05      | 33%          |
| AUV63985.1 HNH homing endonuclease [Shigella phage Sf20]            | 53.1            | 3e-05      | 28%          |
| AUE22559.1 homing endonuclease [Aeromonas phage Ah1]                | 53.1            | 3e-05      | 43%          |
| YP_007004261.1 homing endonuclease [Enterobacteria phage Bp7]       | 53.1            | 3e-05      | 22%          |
| MBV36246.1 hypothetical protein [Rickettsiales bacterium]           | 53.1            | 3e-05      | 42%          |
| YP_007890152.1 putative site-specific DNA endonuclease [Pleodo...]  | 52.8            | 4e-05      | 31%          |
| YP_003358572.1 putative homing endonuclease [Shigella phage Ag3]    | 52.4            | 5e-05      | 32%          |
| AXF53330.1 hypothetical protein [Escherichia virus KFS-EC]          | 52.0            | 7e-05      | 29%          |
| ADJ39722.1 homing endonuclease [Enterobacteria phage T4T]           | 52.4            | 7e-05      | 31%          |
| YP_009030888.1 homing endonuclease [Escherichia phage vB_EcoM...]   | 52.4            | 7e-05      | 31%          |
| YP_009148455.1 putative homing endonuclease [Escherichia phage...]  | 52.4            | 8e-05      | 31%          |
| YP_009284187.1 putative homing endonuclease [Escherichia phage...]  | 52.4            | 8e-05      | 31%          |
| YP_007501262.1 homing endonuclease [Salmonella phage vB_SemMS16]    | 51.6            | 1e-04      | 41%          |
| YP_002117666.1 homing endonuclease [Rhizobium phage 16-3]           | 51.6            | 1e-04      | 39%          |
| YP_004581389.1 orf265 gene product [Schizomeris leibleinii]         | 51.6            | 1e-04      | 42%          |
| WP_148098846.1 HNH endonuclease [Enterobacter hormaechei]           | 49.3            | 1e-04      | 36%          |
| QB064613.1 putative HNH endonuclease [Escherichia phage vB_Eco...]  | 52.0            | 1e-04      | 36%          |
| YP_004300648.1 putative Mob-like homing endonuclease HNH famil...   | 50.8            | 1e-04      | 27%          |
| NP_049674.1 MobB homing endonuclease [Escherichia virus T4]         | 51.6            | 1e-04      | 30%          |
| YP_007890150.1 putative site-specific DNA endonuclease [Pleodo...]  | 51.6            | 1e-04      | 48%          |
| QBQ79945.1 group I intron endonuclease [Escherichia phage vB_E...]  | 50.8            | 2e-04      | 30%          |
| AUS02050.1 HNH nuclease [Vibrio phage 2.058.0._10N.286.46.B8]       | 50.8            | 2e-04      | 36%          |
| YP_008060581.1 putative MobE-like endonuclease [Escherichia ph...]  | 50.8            | 2e-04      | 54%          |
| AEI71212.1 HNH endonuclease [EBPR siphovirus 1]                     | 50.4            | 2e-04      | 40%          |
| AON97067.1 putative Mob-like HNH homing endonuclease [Cronobac...]  | 50.8            | 2e-04      | 54%          |
| AUS02782.1 nuclease associated modular domain 3 protein [Vibri...]  | 50.8            | 2e-04      | 38%          |
| A0G16184.1 putative Mob-like HNH homing endonuclease [Cronobac...]  | 50.4            | 2e-04      | 54%          |
| YP_007674438.1 hypothetical protein SWZG_00073 [Synechococcus ...]  | 49.3            | 3e-04      | 38%          |
| YP_009615704.1 MobB-like homing endonuclease [Salmonella phage...]  | 50.1            | 4e-04      | 42%          |
| YP_006986332.1 putative Mob-like HNH homing endonuclease [Cron...]  | 49.7            | 4e-04      | 54%          |
| SCN45924.1 Putative homing endonuclease [Cronobacter phage Pet...]  | 49.3            | 5e-04      | 34%          |
| ARK07836.1 putative homing endonuclease [Aeromonas phage phiA8...]  | 50.1            | 5e-04      | 54%          |
| RHH45605.1 HNH endonuclease [Citrobacter portucalensis]             | 49.3            | 8e-04      | 41%          |
| WP_147355674.1 HNH endonuclease [Citrobacter portucalensis]         | 49.3            | 8e-04      | 41%          |
| AYJ74548.1 homing endonuclease [Yersinia phage PYPS2T]              | 48.9            | 8e-04      | 35%          |
| P09753.1 RecName: Full=Uncharacterized 38.5 kDa protein in psb...   | 49.3            | 9e-04      | 44%          |
| BAR28234.1 hypothetical protein [uncultured Mediterranean phag...]  | 48.9            | 9e-04      | 40%          |
| YP_005089832.1 orf192 gene product [Dunaliella salina]              | 48.5            | 9e-04      | 29%          |
| QCW23038.1 hypothetical protein [Synechococcus phage S-B05]         | 47.8            | 0.001      | 45%          |
| AV022872.1 putative homing endonuclease [Erwinia phage vB_EamM...]  | 48.9            | 0.001      | 39%          |

|                |                                                        |      |       |     |
|----------------|--------------------------------------------------------|------|-------|-----|
| AL063248.1     | putative HNH homing endonuclease [Chlamydomonas app... | 49.3 | 0.001 | 44% |
| NP_049844.1    | MobE homing endonuclease [Escherichia virus T4]        | 47.4 | 0.001 | 37% |
| YP_009618315.1 | hypothetical protein Cf1_00266 [Citrobacter pha...     | 48.5 | 0.001 | 47% |
| ADJ39953.1     | homing endonuclease [Enterobacteria phage T4T]         | 48.1 | 0.002 | 37% |
| VEV88876.1     | Phage-associated homing endonuclease [Yersinia phag... | 48.1 | 0.002 | 40% |
| YP_008531965.1 | putative homing endonuclease [Klebsiella virus ...     | 48.1 | 0.002 | 36% |
| YP_003858492.1 | putative Mob-like HNH homing endonuclease [Esch...     | 48.1 | 0.002 | 36% |
| AWD91901.1     | homing endonuclease [Enterobacteria phage vB_EcoM_I... | 47.8 | 0.002 | 40% |
| ASZ77353.1     | homing endonuclease [Escherichia phage EC04]           | 47.8 | 0.002 | 36% |
| ARK07878.1     | putative homing endonuclease [Aeromonas phage phiA8... | 48.1 | 0.002 | 51% |
| QB064906.1     | hypothetical protein G50_00032 [Escherichia phage v... | 47.8 | 0.002 | 40% |
| YP_009288835.1 | putative HNH homing endonuclease [Klebsiella ph...     | 47.8 | 0.003 | 30% |
| WP_133330109.1 | HNH endonuclease [Oxalobacteraceae bacterium SA...     | 46.6 | 0.003 | 44% |
| YP_009102983.1 | hypothetical protein DA66_0144 [Dickeya phage R...     | 47.8 | 0.003 | 33% |
| AUG88058.1     | homing endonuclease [Klebsiella phage May]             | 47.4 | 0.003 | 35% |
| AUS02988.1     | HNH nuclease [Vibrio phage 2.275.0._10N.286.54.E11]    | 47.8 | 0.003 | 45% |
| YP_009168793.1 | putative homing endonuclease [Escherichia phage...     | 47.8 | 0.003 | 35% |
| YP_802996.1    | putative site-specific intron-like DNA endonucleas...  | 47.4 | 0.003 | 39% |
| NP_943926.1    | MobE homing endonuclease [Aeromonas virus Aeh1]        | 47.4 | 0.003 | 41% |
| YP_009210148.1 | Homing endonuclease [Enterobacteria phage JSE] ...     | 47.4 | 0.003 | 39% |
| ANZ50908.1     | homing endonuclease [Enterobacteria phage Aplg8]       | 47.4 | 0.003 | 39% |
| AUM58396.1     | putative homing endonuclease [Proteus phage phiP4-3]   | 47.4 | 0.003 | 36% |
| WP_080181637.1 | HNH endonuclease [Salmonella enterica]                 | 47.4 | 0.003 | 39% |

Database: All non-redundant GenBank CDS translations+PDB+SwissProt+PIR+PRF  
excluding environmental samples from WGS projects  
Posted date: Aug 30, 2019 12:43 AM  
Number of letters in database: 84,697,594,569  
Number of sequences in database: 234,979,574

Lambda K H  
0.320 0.137 0.401

Gapped  
Lambda K H  
0.267 0.0410 0.140

Matrix: BLOSUM62

Gap Penalties: Existence: 11, Extension: 1

Number of Sequences: 234979574

Number of Hits to DB: 90961860

Number of extensions: 67340

Number of successful extensions: 15796

Number of sequences better than 100: 848

Number of HSP's better than 100 without gapping: 0

Number of HSP's gapped: 14739

Number of HSP's successfully gapped: 1416

Length of database: 84697594569

T: 21

A: 40

X1: 16 (7.4 bits)

X2: 38 (14.6 bits)

X3: 64 (24.7 bits)

S1: 41 (20.4 bits)

ka-blk-alpha gapped: 1.9

ka-blk-alpha ungapped: 0.7916

ka-blk-alpha\_v gapped: 42.6028

ka-blk-alpha\_v ungapped: 4.96466

ka-blk-sigma gapped: 43.6362
