# Supplementary material for: Promising prospects of nanopore sequencing for algal hologenomics and structural variation discovery
Source: PubMed Central journal article supplement (PMC6854639; doi:10.1186/s12864-019-6248-2), 2019-11-13
Supplement: 12864_2019_6248_MOESM17_ESM.pdf [file 12864_2019_6248_MOESM17_ESM.pdf]

BLASTP 2.10.0+

Reference: Stephen F. Altschul, Thomas L. Madden, Alejandro A. Schaffer, Jinghui Zhang, Zheng Zhang, Webb Miller, and David J. Lipman (1997), "Gapped BLAST and PSI-BLAST: a new generation of protein database search programs", *Nucleic Acids Res.* 25:3389-3402.

Reference for compositional score matrix adjustment: Stephen F. Altschul, John C. Wootton, E. Michael Gertz, Richa Agarwala, Aleksandr Morgulis, Alejandro A. Schaffer, and Yi-Kuo Yu (2005) "Protein database searches using compositionally adjusted substitution matrices", *FEBS J.* 272:5101-5109.

RID: SA820JPM014

Database: All non-redundant GenBank CDS translations+PDB+SwissProt+PIR+PRF excluding environmental samples from WGS projects  
234,979,574 sequences; 84,697,594,569 total letters

#####

Query= ORF7

Length=376

| Sequences producing significant alignments:                          | Score (Bits) | E Value | Max Ident |
|----------------------------------------------------------------------|--------------|---------|-----------|
| YP_009519162.1 hypothetical protein [Caulerpa verticillata]          | 335          | 3e-111  | 61%       |
| YP_009472820.1 hypothetical protein [Caulerpa manorensis]            | 259          | 1e-80   | 42%       |
| YP_009519448.1 hypothetical protein [Rhipiliopsis peltata]           | 206          | 1e-59   | 56%       |
| AYC64487.1 hypothetical protein [Pseudochlorodesmis sp. HV01306c]    | 197          | 9e-58   | 54%       |
| AOP19087.1 hypothetical protein [Halimeda discoidea]                 | 184          | 2e-53   | 58%       |
| YP_009306362.1 hypothetical protein [Caulerpa cliftonii]             | 106          | 4e-21   | 31%       |
| YP_009519140.1 hypothetical protein [Caulerpa verticillata]          | 97.4         | 8e-21   | 48%       |
| ARR28454.1 hypothetical protein [Caulerpa okamurae]                  | 89.7         | 2e-17   | 34%       |
| AYC64090.1 hypothetical protein [Johnson-sea-linkia profunda]        | 89.7         | 1e-15   | 27%       |
| AOP19034.1 hypothetical protein [Halimeda discoidea]                 | 89.4         | 2e-15   | 34%       |
| YP_009472588.1 hypothetical protein [Rhipilia penicilloides]         | 88.6         | 4e-15   | 28%       |
| YP_009130586.1 putative DNA primase [Tydemania expeditionis]         | 86.7         | 7e-15   | 29%       |
| YP_009326773.1 hypothetical protein [Caulerpa racemosa]              | 86.3         | 2e-14   | 28%       |
| YP_009472859.1 hypothetical protein [Caulerpa manorensis]            | 85.5         | 4e-14   | 28%       |
| YP_009518867.1 hypothetical protein [Boodleopsis pusilla]            | 83.2         | 2e-13   | 31%       |
| WP_106459521.1 DUF3854 domain-containing protein [Aphanothece ...]   | 74.3         | 2e-10   | 30%       |
| OQX20052.1 hypothetical protein BWK76_02530 [Desulfobulbaceae ...]   | 73.2         | 4e-10   | 29%       |
| WP_106459359.1 DUF3854 domain-containing protein [Aphanothece ...]   | 72.0         | 1e-09   | 29%       |
| WP_106872064.1 MULTISPECIES: hypothetical protein [unclassified ...] | 60.5         | 5e-06   | 28%       |
| WP_048670661.1 toprim domain-containing protein [Candidatus Co ...]  | 57.4         | 5e-05   | 29%       |
| WP_117948860.1 hypothetical protein [Faecalibacterium prausnit ...]  | 56.6         | 8e-05   | 27%       |
| ASC70311.1 hypothetical protein XM38_012480 [Halomicronema hon ...]  | 55.1         | 2e-04   | 27%       |
| WP_137455024.1 hypothetical protein [Halomicronema hongdechloris]    | 55.1         | 3e-04   | 27%       |
| WP_005329991.1 phage/plasmid primase P4 family domain [Coryneb ...]  | 53.9         | 5e-04   | 24%       |
| WP_080099994.1 hypothetical protein [Vibrio cholerae]                | 53.9         | 6e-04   | 26%       |
| EKY32300.1 hypothetical protein OSU_2061 [Vibrio cholerae PS15]      | 53.5         | 8e-04   | 26%       |
| WP_015537438.1 phage/plasmid primase, P4 family, C-terminal do ...]  | 52.8         | 0.001   | 25%       |
| WP_097783161.1 hypothetical protein [Faecalibacterium prausnit ...]  | 52.4         | 0.002   | 25%       |
| CVI73287.1 hypothetical protein NDGK_02952 [Clostridiales bact ...]  | 51.2         | 0.002   | 25%       |
| HBJ06247.1 TPA: hypothetical protein [Erysipelotrichaceae bact ...]  | 50.8         | 0.004   | 29%       |

|                |                                                        |      |       |     |
|----------------|--------------------------------------------------------|------|-------|-----|
| TAD79303.1     | hypothetical protein EA001_04585 [Oscillatoriales c... | 51.2 | 0.004 | 27% |
| YP_009519502.1 | hypothetical protein [Rhipiliopsis peltata]            | 47.4 | 0.005 | 33% |
| PXX83167.1     | hypothetical protein DLY76_13175 [Staphylococcus wa... | 50.8 | 0.005 | 27% |
| WP_089826771.1 | DNA primase [Clostridiales bacterium CHKCI001]         | 50.1 | 0.006 | 26% |
| WP_122135129.1 | hypothetical protein [Staphylococcus warneri]          | 50.4 | 0.006 | 27% |
| WP_058709749.1 | hypothetical protein [Staphylococcus warneri]          | 50.4 | 0.007 | 27% |
| WP_117726019.1 | hypothetical protein [Staphylococcus warneri]          | 50.4 | 0.007 | 27% |
| WP_099533992.1 | DUF3854 domain-containing protein [Limnothrix s...     | 50.4 | 0.008 | 25% |
| WP_122135133.1 | hypothetical protein [Staphylococcus warneri]          | 50.4 | 0.008 | 27% |
| OCQ94853.1     | hypothetical protein BCR12_14730 [Limnothrix sp. P1... | 50.4 | 0.008 | 25% |
| YP_009519361.1 | hypothetical protein [Pseudocodium devriesii]          | 48.5 | 0.009 | 32% |
| WP_051669969.1 | hypothetical protein [Methylomonas sp. LW13]           | 49.7 | 0.011 | 27% |
| WP_050044965.1 | DUF3854 domain-containing protein [Tolypothrix ...     | 49.7 | 0.014 | 25% |
| BAY87916.1     | primase P4 [Calothrix parasitica NIES-267]             | 49.7 | 0.015 | 24% |
| WP_087545683.1 | hypothetical protein [Nostocales cyanobacterium...     | 49.3 | 0.015 | 27% |
| WP_096661640.1 | DUF3854 domain-containing protein [Calothrix pa...     | 49.7 | 0.016 | 24% |
| WP_134356385.1 | toprim domain-containing protein [Nitrosococcus...     | 48.9 | 0.021 | 26% |
| WP_114735354.1 | hypothetical protein [Vibrio cholerae]                 | 48.9 | 0.025 | 24% |
| WP_148519512.1 | hypothetical protein [Vibrio cholerae]                 | 48.5 | 0.029 | 24% |
| WP_082755228.1 | hypothetical protein [Bradyrhizobium diazoeffic...     | 48.5 | 0.032 | 27% |
| YP_009519210.1 | hypothetical protein [Caulerpa verticillata]           | 48.1 | 0.036 | 36% |
| AL050062.1     | E1 protein [Deltapapillomavirus 5]                     | 47.8 | 0.046 | 29% |
| WP_081712488.1 | hypothetical protein [Gordonia amicalis]               | 47.4 | 0.060 | 30% |
| WP_076343410.1 | hypothetical protein [Paludisphaera borealis]          | 47.4 | 0.079 | 26% |
| WP_143052189.1 | hypothetical protein [Halobacterium jilantaiense]      | 47.0 | 0.090 | 26% |
| BBD63650.1     | hypothetical protein NIES2109_65250 [Nostoc sp. HK-01] | 47.0 | 0.10  | 27% |
| YP_009519427.1 | hypothetical protein [Rhipiliopsis peltata]            | 46.2 | 0.12  | 38% |
| WP_015014502.1 | phage/plasmid primase [Acidovorax sp. KKS102]          | 45.4 | 0.27  | 27% |
| WP_069652414.1 | toprim domain-containing protein [Aeromonas cav...     | 45.4 | 0.28  | 26% |
| TMQ25139.1     | NTP-binding protein [Deltaproteobacteria bacterium]    | 45.1 | 0.32  | 27% |
| WP_099869324.1 | NTP-binding protein [Mycobacterium heckeshornense]     | 44.7 | 0.44  | 27% |
| WP_071700079.1 | hypothetical protein [Mycobacterium heckeshorne...     | 44.7 | 0.49  | 27% |
| WP_055185464.1 | hypothetical protein [Faecalibacterium prausnit...     | 43.9 | 0.79  | 27% |
| WP_117554111.1 | hypothetical protein [Faecalibacterium prausnit...     | 43.9 | 0.81  | 27% |
| WP_120020883.1 | hypothetical protein [Faecalibacterium sp. AF10...     | 43.9 | 0.85  | 23% |
| WP_080793152.1 | hypothetical protein [Corynebacterium sp. Marse...     | 43.5 | 0.93  | 21% |
| AVP41438.1     | DNA primase [Streptomyces phage Yara]                  | 43.9 | 0.95  | 28% |
| WP_146372635.1 | DUF3854 domain-containing protein [Planctomycet...     | 43.5 | 1.0   | 25% |
| AXQ00533.1     | E1 protein [Okapia johnstoni papillomavirus 1]         | 43.5 | 1.1   | 28% |
| WP_103918394.1 | hypothetical protein [Thiotrichales bacterium H...     | 43.5 | 1.1   | 25% |
| WP_127066654.1 | hypothetical protein [Cellulosilyticum sp. WCF-2]      | 43.1 | 1.1   | 25% |
| WP_025988927.1 | hypothetical protein [Mycobacteroides abscessus]       | 43.5 | 1.2   | 27% |
| SHP30503.1     | phage/plasmid primase, P4 family, C-terminal domain... | 43.5 | 1.2   | 27% |
| WP_145718318.1 | hypothetical protein [Mesorhizobium tianshanense]      | 43.5 | 1.2   | 30% |
| WP_074243874.1 | unnamed protein product                                | 43.5 | 1.2   | 27% |
| WP_052617223.1 | hypothetical protein [Mycobacteroides abscessus]       | 43.5 | 1.2   | 26% |
| CPS32393.1     | phage/plasmid primase%2C P4 family%2C C-terminal do... | 43.5 | 1.3   | 27% |
| QEA05367.1     | hypothetical protein KBTEX_01688 [uncultured organism] | 43.1 | 1.3   | 25% |
| CPU37683.1     | bacteriophage protein [Mycobacteroides abscessus]      | 43.5 | 1.3   | 27% |
| WP_052536874.1 | hypothetical protein [Mycobacteroides abscessus]       | 43.5 | 1.3   | 27% |
| WP_074269985.1 | hypothetical protein [Mycobacteroides abscessus]       | 43.1 | 1.4   | 27% |
| WP_100451585.1 | hypothetical protein [Mycobacteroides abscessus]       | 43.1 | 1.4   | 27% |
| WP_100460742.1 | hypothetical protein [Mycobacteroides abscessus]       | 43.1 | 1.5   | 24% |
| WP_119570835.1 | hypothetical protein [Mycobacteroides abscessus]       | 43.1 | 1.5   | 27% |
| OGS01264.1     | hypothetical protein A3G41_05925 [Elusimicrobia bac... | 43.1 | 1.6   | 21% |
| SHP11590.1     | phage/plasmid primase [Mycobacteroides abscessus su... | 43.1 | 1.7   | 27% |
| YP_009508736.1 | E1 protein [Giraffa camelopardalis papillomavir...     | 42.7 | 1.7   | 28% |
| SHP06125.1     | bacteriophage protein [Mycobacteroides abscessus su... | 42.4 | 2.6   | 24% |
| WP_144681351.1 | hypothetical protein [Desulfohalobium alkaliphilus]    | 42.4 | 2.6   | 30% |
| WP_074232794.1 | hypothetical protein [Mycobacteroides abscessus]       | 42.4 | 2.8   | 24% |
| WP_098923763.1 | hypothetical protein [Faecalibacterium prausnit...     | 42.0 | 2.9   | 23% |
| SKI81432.1     | bacteriophage protein [Mycobacteroides abscessus su... | 42.4 | 3.0   | 24% |
| WP_064996905.1 | hypothetical protein [Mycolicibacter heraklione...     | 42.0 | 3.6   | 26% |
| PKM60256.1     | DNA primase [Firmicutes bacterium HGW-Firmicutes-4]    | 42.0 | 3.9   | 25% |

|                                                                  |      |     |     |
|------------------------------------------------------------------|------|-----|-----|
| WP_006347292.1 NTP-binding protein [Streptomyces tsukubensis]    | 41.2 | 4.8 | 25% |
| PZV21913.1 DNA primase [Snowella sp.]                            | 41.6 | 5.1 | 28% |
| KUL51672.1 NTP-binding protein [Streptomyces sp. NRRL S-1521]    | 41.2 | 5.3 | 26% |
| KFG75654.1 hypothetical protein FM21_05885 [Streptomyces luteus] | 41.2 | 5.4 | 26% |
| WP_107063888.1 NTP-binding protein [Streptomyces luteus]         | 41.2 | 5.6 | 26% |
| ALL29332.1 E1 [Bovine papillomavirus type 14]                    | 41.2 | 5.7 | 29% |

#####

Query= ORF8

Length=660

| Sequences producing significant alignments:                        | Score<br>(Bits) | E<br>Value | Max<br>Ident |
|--------------------------------------------------------------------|-----------------|------------|--------------|
| YP_009326860.1 hypothetical protein [Caulerpa racemosa]            | 253             | 1e-74      | 43%          |
| AY045732.1 hypothetical protein [Caulerpa cupressoides]            | 182             | 3e-49      | 40%          |
| YP_009519211.1 hypothetical protein [Caulerpa verticillata]        | 176             | 4e-43      | 30%          |
| YP_009519359.1 hypothetical protein [Pseudocodium devriesii]       | 152             | 3e-36      | 29%          |
| YP_009519163.1 hypothetical protein [Caulerpa verticillata]        | 136             | 4e-34      | 62%          |
| YP_009326773.1 hypothetical protein [Caulerpa racemosa]            | 151             | 4e-34      | 26%          |
| YP_009519209.1 hypothetical protein [Caulerpa verticillata]        | 137             | 1e-33      | 52%          |
| YP_009472855.1 hypothetical protein [Caulerpa manorensis]          | 147             | 5e-33      | 26%          |
| AYC64085.1 hypothetical protein [Johnson-sea-linkia profunda]      | 145             | 6e-33      | 25%          |
| WP_008287183.1 bifunctional 3'-5' exonuclease/DNA polymerase [...] | 136             | 6e-30      | 26%          |
| WP_121011606.1 bifunctional 3'-5' exonuclease/DNA polymerase [...] | 132             | 1e-28      | 26%          |
| WP_121922680.1 bifunctional 3'-5' exonuclease/DNA polymerase [...] | 129             | 1e-27      | 30%          |
| WP_028949995.1 bifunctional 3'-5' exonuclease/DNA polymerase [...] | 128             | 2e-27      | 26%          |
| EGS31161.1 DNA-directed DNA polymerase [Peptoniphilus sp. oral...] | 126             | 3e-27      | 27%          |
| WP_012673655.1 bifunctional 3'-5' exonuclease/DNA polymerase [...] | 127             | 5e-27      | 26%          |
| MAV17669.1 DNA polymerase I [Gammaproteobacteria bacterium]        | 127             | 1e-26      | 31%          |
| WP_072469393.1 DNA polymerase I [Urinacoccus massiliensis]         | 125             | 6e-26      | 27%          |
| WP_034440597.1 DNA polymerase I [Tissierellia bacterium S5-A11]    | 125             | 7e-26      | 27%          |
| WP_097041874.1 DNA polymerase I [Terribacillus aidingensis]        | 125             | 1e-25      | 26%          |
| WP_099208946.1 DNA polymerase I [Urinacoccus sp. Marseille-P3926]  | 124             | 1e-25      | 27%          |
| WP_068868882.1 DNA polymerase I [Planococcus plakortidis]          | 124             | 1e-25      | 28%          |
| AKE21663.1 DNA polymerase A family protein [Francisella tulare...] | 118             | 2e-25      | 30%          |
| WP_131748623.1 DNA polymerase I [Anaerococcus prevotii]            | 124             | 2e-25      | 27%          |
| WP_095220162.1 DNA polymerase I [Terribacillus saccharophilus]     | 124             | 2e-25      | 26%          |
| WP_095272594.1 DNA polymerase I [Terribacillus saccharophilus]     | 124             | 2e-25      | 26%          |
| RUM46834.1 bifunctional 3'-5' exonuclease/DNA polymerase [Hydr...] | 122             | 2e-25      | 26%          |
| AYC64023.1 hypothetical protein [Halimeda micronesica]             | 112             | 2e-25      | 45%          |
| WP_095232974.1 DNA polymerase I [Terribacillus saccharophilus]     | 123             | 2e-25      | 26%          |
| WP_095260824.1 DNA polymerase I [Terribacillus saccharophilus]     | 123             | 3e-25      | 26%          |
| WP_095226616.1 DNA polymerase I [Terribacillus saccharophilus]     | 123             | 3e-25      | 26%          |
| WP_095222178.1 DNA polymerase I [Virgibacillus sp. 7505]           | 123             | 3e-25      | 26%          |
| WP_077308099.1 DNA polymerase I [Terribacillus halophilus]         | 123             | 4e-25      | 26%          |
| WP_142330819.1 DNA polymerase I [Bacillus thuringiensis]           | 122             | 4e-25      | 26%          |
| WP_121300248.1 DNA polymerase I [Planococcus citreus]              | 122             | 5e-25      | 28%          |
| WP_069718151.1 DNA polymerase I [Bacillus solimangrovi]            | 122             | 6e-25      | 26%          |
| PFP11927.1 DNA polymerase I [Bacillus thuringiensis]               | 122             | 6e-25      | 26%          |
| PMP76048.1 bifunctional 3'-5' exonuclease/DNA polymerase [Sulf...] | 121             | 6e-25      | 24%          |
| PFE06921.1 DNA polymerase I [Bacillus cereus]                      | 121             | 1e-24      | 26%          |
| OON59049.1 DNA polymerase I [Klebsiella pneumoniae]                | 118             | 1e-24      | 26%          |
| WP_040955141.1 DNA polymerase I [Virgibacillus sp. SK37]           | 121             | 1e-24      | 24%          |
| WP_141532717.1 DNA polymerase I [Bacillus cereus]                  | 121             | 1e-24      | 26%          |
| WP_093879404.1 DNA polymerase I [Terribacillus saccharophilus]     | 121             | 1e-24      | 25%          |
| TKJ03686.1 DNA polymerase I [Bacillus cereus]                      | 119             | 1e-24      | 26%          |
| WP_141525460.1 DNA polymerase I [Bacillus cereus]                  | 121             | 1e-24      | 26%          |
| WP_140386899.1 MULTISPECIES: DNA polymerase I [Bacillus cereus...] | 121             | 1e-24      | 26%          |
| PFL69735.1 DNA polymerase I [Bacillus cereus]                      | 121             | 1e-24      | 26%          |
| PFB29359.1 DNA polymerase I [Bacillus cereus]                      | 121             | 1e-24      | 26%          |

|                |                                                        |     |       |     |
|----------------|--------------------------------------------------------|-----|-------|-----|
| PMP60411.1     | bifunctional 3'-5' exonuclease/DNA polymerase [Sulf... | 120 | 2e-24 | 24% |
| WP_141558566.1 | DNA polymerase I [Bacillus thuringiensis]              | 121 | 2e-24 | 26% |
| WP_142947063.1 | DNA polymerase I [Bacillus cereus]                     | 120 | 2e-24 | 26% |
| WP_141538298.1 | DNA polymerase I [Bacillus thuringiensis]              | 120 | 2e-24 | 26% |
| PGW45597.1     | DNA polymerase I [Bacillus thuringiensis]              | 120 | 2e-24 | 26% |
| AHA74189.1     | DNA polymerase I [Bacillus thuringiensis YBT-1518]     | 120 | 2e-24 | 26% |
| WP_025117755.1 | DNA polymerase I [Bacillus sp. H1m]                    | 120 | 2e-24 | 26% |
| WP_140392562.1 | DNA polymerase I [Bacillus cereus]                     | 120 | 2e-24 | 26% |
| WP_080672436.1 | DNA polymerase I [Bacillus thuringiensis]              | 120 | 2e-24 | 26% |
| WP_075716589.1 | MULTISPECIES: DNA polymerase I [Bacillus cereus...     | 120 | 2e-24 | 26% |
| PEC73952.1     | DNA polymerase I [Bacillus thuringiensis]              | 120 | 2e-24 | 26% |
| WP_022853929.1 | DNA polymerase I [Thermodesulfatator atlanticus]       | 120 | 2e-24 | 28% |
| WP_053563570.1 | MULTISPECIES: DNA polymerase I [Bacillus]              | 120 | 2e-24 | 26% |
| WP_063548740.1 | MULTISPECIES: DNA polymerase I [Bacillus cereus...     | 120 | 2e-24 | 26% |
| TCL51840.1     | DNA polymerase I [Thermolongibacillus altinsuensis]    | 120 | 2e-24 | 25% |
| WP_000412829.1 | MULTISPECIES: DNA polymerase I [Bacillus]              | 120 | 2e-24 | 26% |
| WP_065229422.1 | MULTISPECIES: DNA polymerase I [Bacillus cereus...     | 120 | 2e-24 | 26% |
| PEE64345.1     | DNA polymerase I [Bacillus thuringiensis]              | 120 | 2e-24 | 26% |
| PES44316.1     | DNA polymerase I [Bacillus thuringiensis]              | 120 | 2e-24 | 26% |
| PEF03997.1     | DNA polymerase I [Bacillus thuringiensis]              | 120 | 2e-24 | 26% |
| WP_065485383.1 | DNA polymerase I [Bacillus thuringiensis]              | 120 | 2e-24 | 26% |
| AVP46514.1     | DNA polymerase I [Bacillus cereus]                     | 120 | 2e-24 | 26% |
| WP_141505510.1 | DNA polymerase I [Bacillus thuringiensis]              | 120 | 2e-24 | 26% |
| WP_142327068.1 | DNA polymerase I [Bacillus thuringiensis]              | 120 | 2e-24 | 26% |
| PE001438.1     | DNA polymerase I [Bacillus cereus]                     | 120 | 2e-24 | 26% |
| WP_016512259.1 | MULTISPECIES: DNA polymerase I [Bacillus]              | 120 | 2e-24 | 26% |
| WP_141484265.1 | DNA polymerase I [Bacillus thuringiensis]              | 120 | 2e-24 | 26% |
| WP_078993673.1 | DNA polymerase I [Bacillus thuringiensis]              | 120 | 2e-24 | 26% |
| WP_141550417.1 | DNA polymerase I [Bacillus thuringiensis]              | 120 | 2e-24 | 26% |
| WP_113303084.1 | DNA polymerase I [Bacillus cereus]                     | 120 | 2e-24 | 26% |
| WP_132947547.1 | DNA polymerase I [Thermolongibacillus altinsuen...     | 120 | 2e-24 | 25% |
| PEB73834.1     | DNA polymerase I [Bacillus thuringiensis]              | 120 | 2e-24 | 26% |
| WP_080469882.1 | DNA polymerase I [Bacillus cereus]                     | 120 | 2e-24 | 26% |
| WP_145959744.1 | DNA polymerase I [Bacillus cereus]                     | 120 | 2e-24 | 26% |
| WP_141493449.1 | DNA polymerase I [Bacillus thuringiensis]              | 120 | 2e-24 | 26% |
| COF45140.1     | DNA polymerase I [Streptococcus pneumoniae]            | 118 | 2e-24 | 26% |
| PFJ62672.1     | DNA polymerase I [Bacillus thuringiensis]              | 120 | 2e-24 | 26% |
| WP_080126339.1 | DNA polymerase I [Bacillus cereus]                     | 120 | 3e-24 | 26% |
| WP_038562164.1 | DNA polymerase I [Terribacillus goriensis]             | 120 | 3e-24 | 25% |
| WP_080017654.1 | MULTISPECIES: DNA polymerase I [Bacillus cereus...     | 120 | 3e-24 | 26% |
| PEG03856.1     | DNA polymerase I [Bacillus cereus]                     | 120 | 3e-24 | 26% |
| WP_142312045.1 | DNA polymerase I [Bacillus cereus]                     | 120 | 3e-24 | 26% |
| PDX94771.1     | DNA polymerase I [Bacillus thuringiensis]              | 120 | 3e-24 | 26% |
| WP_144524277.1 | DNA polymerase I [Bacillus thuringiensis]              | 120 | 3e-24 | 26% |
| WP_060486537.1 | DNA polymerase I [Bacillus wiedmannii]                 | 120 | 3e-24 | 26% |
| PED35322.1     | DNA polymerase I [Bacillus cereus]                     | 120 | 3e-24 | 26% |
| WP_102707368.1 | DNA polymerase I [Terribacillus goriensis]             | 120 | 3e-24 | 25% |
| PHD63790.1     | DNA polymerase I [Bacillus wiedmannii]                 | 120 | 3e-24 | 26% |
| WP_142399372.1 | DNA polymerase I [Bacillus wiedmannii]                 | 120 | 3e-24 | 26% |
| WP_142309456.1 | DNA polymerase I [Bacillus cereus]                     | 120 | 3e-24 | 26% |
| PRT05698.1     | DNA polymerase I [Bacillus wiedmannii]                 | 120 | 3e-24 | 26% |
| WP_144463139.1 | MULTISPECIES: DNA polymerase I [Bacillus]              | 120 | 3e-24 | 25% |
| WP_120075084.1 | DNA polymerase I [Bacillus fortis]                     | 120 | 3e-24 | 25% |

#####

Query= ORF9

Length=651

| Sequences producing significant alignments: | Score (Bits) | E Value | Max Ident |
|---------------------------------------------|--------------|---------|-----------|
|---------------------------------------------|--------------|---------|-----------|

|                                                                    |      |        |     |
|--------------------------------------------------------------------|------|--------|-----|
| AY045733.1 hypothetical protein [Caulerpa cupressoides]            | 760  | 0.0    | 65% |
| YP_009326774.1 hypothetical protein [Caulerpa racemosa]            | 681  | 0.0    | 59% |
| YP_009472822.1 hypothetical protein [Caulerpa manorensis]          | 662  | 0.0    | 64% |
| YP_009472858.1 hypothetical protein [Caulerpa manorensis]          | 551  | 0.0    | 56% |
| ARR28462.1 hypothetical protein [Caulerpa okamurae]                | 447  | 3e-150 | 70% |
| YP_009326795.1 hypothetical protein [Caulerpa racemosa]            | 282  | 4e-86  | 59% |
| YP_009326809.1 hypothetical protein [Caulerpa racemosa]            | 144  | 4e-35  | 68% |
| AY045724.1 putative DNA polymerase I [Caulerpa cupressoides]       | 88.6 | 1e-16  | 52% |
| YP_009472804.1 hypothetical protein [Caulerpa manorensis]          | 77.4 | 2e-12  | 49% |
| AYC64086.1 hypothetical protein [Johnson-sea-linkia profunda]      | 72.8 | 2e-09  | 25% |
| AYC64626.1 hypothetical protein [Halimeda minima]                  | 68.9 | 6e-09  | 29% |
| AY045723.1 putative LAGLIDADG homing endonuclease [Caulerpa cu...] | 60.1 | 6e-08  | 61% |
| YP_009519615.1 hypothetical protein [Udotea flabellum]             | 67.4 | 7e-08  | 26% |
| ARR28439.1 hypothetical protein [Caulerpa okamurae]                | 55.5 | 4e-05  | 43% |
| YP_009518872.1 hypothetical protein [Boodleopsis pusilla]          | 55.1 | 4e-04  | 25% |
| AYC64617.1 hypothetical protein [Halimeda minima]                  | 54.3 | 7e-04  | 25% |

Database: All non-redundant GenBank CDS translations+PDB+SwissProt+PIR+PRF  
excluding environmental samples from WGS projects

Posted date: Aug 30, 2019 12:43 AM

Number of letters in database: 84,697,594,569

Number of sequences in database: 234,979,574

Lambda      K          H  
0.317      0.135      0.380

Gapped

Lambda      K          H  
0.267      0.0410      0.140

Matrix: BLOSUM62

Gap Penalties: Existence: 11, Extension: 1

Number of Sequences: 234979574

Number of Hits to DB: 90373741

Number of extensions: 155835

Number of successful extensions: 97294

Number of sequences better than 100: 4024

Number of HSP's better than 100 without gapping: 0

Number of HSP's gapped: 76902

Number of HSP's successfully gapped: 10950

Length of database: 84697594569

T: 21

A: 40

X1: 16 (7.3 bits)

X2: 38 (14.6 bits)

X3: 64 (24.7 bits)

S1: 41 (20.4 bits)

ka-blk-alpha gapped: 1.9

ka-blk-alpha ungapped: 0.7916

ka-blk-alpha\_v gapped: 42.6028

ka-blk-alpha\_v ungapped: 4.96466

ka-blk-sigma gapped: 43.6362
